# Supplementary material for: The Effect of FOXC2-AS1 on White Adipocyte Browning and the Possible Regulatory Mechanism
Source: Front Endocrinol (Lausanne). 2020 Oct 29;11:565483. doi: 10.3389/fendo.2020.565483 (PMC7658007; doi:10.3389/fendo.2020.565483)
Supplement: Supplementary file 6 [file Table_2.xls]

## Sheet: Primer Sequence
Supplement Table S2. PCR primers and condition used in this study.
Gene	Forward Seuence(5' to 3')	Reverse Seuence(5' to 3')
Human-FOXC2-AS1	TTCATCGGCTGCGTATTCG	TTGCCTTCTAGTCGCCTCC
Human-FOXC2	CCTCCTGGTATCTCAACCACA	GAGGGTCGAGTTCTCAATCCC
Human-UCP-1	CTGGAATAGCGGCGTGCTT	AATAACACTGGACGTCGGGC
Human-PGC1α	ACCTGACACAACACGGACAG	GTCTCCATCATCCCGCAGAT
Human-DIO2	AGTGCAGAAGGAGGTGACAACAGT	AAAGTCAAGAAGGTGGCATGTGGC
Human-PRDM16	GCGGTCTGTTAGCTTTGGAG	AGTGTCTTCGGAAAGGGACA
Human-PPARγ	GCTGTGCAGGAGATCACAGA	GGGCTCCATAAAGTCACCAA
Human-C/EBPα	TGGACAAGAACAGCAACGAG	TTGTCACTGGTCAGCTCCAG
Human-FABP4	GGCCAGGAATTTGACGAAGT	ATCCCACAGAATGTTGTAGAGT
Human-ATGL	GTGTCAGACGGCGAGAATG	TGGAGGGAGGGAGGGATG
Human-PPIA	TTCATCTGCACTGCCAAGAC	TCGAGTTGTCCACAGTCAGC
